# Supplementary material for: Effects of different ratios of nitrogen base fertilizer to topdressing on soil nitrogen form and enzyme activity in sugar beet under shallow drip irrigation
Source: PeerJ. 2024 Oct 14;12:e18219. doi: 10.7717/peerj.18219 (PMC11485128; doi:10.7717/peerj.18219)
Supplement: Supplemental Information 1 [file peerj-12-18219-s001.xlsx]

## Sheet: Nitrate nitrogen
		Nitrate nitrogen	LRGP					RSGP
		20cm	N0	N1	N2	N3	N4	N0	N1	N2	N3	N4
			9.3	9.45686	9.39949	11.9205	11.8187	11.3004	12.6366	12.2123	15.0671	15.5459
			7.55296	9.55503	10.8306	10.2056	12.0749	10.4791	11.1523	12.7711	13.6859	17.1707
			8.3	8.5	9.3	11.2	10.6	11.8	11.9	13.9	15.5	18.1
		40cm	N0	N1	N2	N3	N4	N0	N1	N2	N3	N4
			6.52589	8.16318	7.18357	8.51077	7.69687	11.6892	12.3437	11.3312	12.5592	12.9164
			6.32796	7.16347	7.80848	8.61399	9.28653	10.446	11.5067	12.6023	12.9335	11.5798
			7.9	7.3	8.8	7.1	8.5	10.9	11.3	12.3	11.7	12.3
		60cm	N0	N1	N2	N3	N4	N0	N1	N2	N3	N4
			5.67338	6.62464	6.95387	6.76186	6.41703	10.8083	10.6697	12.3598	12.8007	11.5098
			6.62583	6.11556	6.25751	7.10346	6.86969	10.2083	11.8952	11.6405	11.2472	12.6859
			6.1	6.3	6.7	6.4	7.3	11.5	11.1	11.2	12	12.5

## Sheet: Ammonium nitrogen
		Ammonium nitrogen	LRGP					RSGP
		20cm	N0	N1	N2	N3	N4	N0	N1	N2	N3	N4
			11.6419	13.5304	14.0836	15.6721	16.9966	20.62	17.8988	20.3608	22.5157	19.6096
			10.2327	12.0765	13.1862	13.958	16.1727	18.6899	18.5183	19.3957	20.851	21.5196
			10.8	12.5	14	16.4	15.8	21.3	19.3	18.7	21.3	20.9
		40cm	N0	N1	N2	N3	N4	N0	N1	N2	N3	N4
			12.322	14.3169	14.453	13.7659	15.1207	17.6913	16.5068	19.3102	20.4731	18.5347
			14.1507	13.3277	13.3765	14.6975	14.0899	19.2059	18.6956	18.1792	19.0516	19.5523
			12.6	12.7	14.3	14.5	15.3	18.62	16.8	16.7	18.9	17.7
		60cm	N0	N1	N2	N3	N4	N0	N1	N2	N3	N4
			9.98799	10.8976	11.2268	10.3761	12.4024	10.3529	10.2502	10.1087	10.5959	10.8315
			8.13714	9.73204	10.1228	11.3884	10.3853	11.5529	11.5081	11.5285	12.0248	11.4548
			9.7	8.9	9.3	10.8	11.6	12.3	10.9	11.9	12.5	11.6

## Sheet: protease
		protease	LRGP					RSGP
		20cm	N0	N1	N2	N3	N4	N0	N1	N2	N3	N4
			206.122	203.961	213.221	240.446	230.488	199.644	223.026	228.708	263.569	278.428
			219.225	215.467	230.497	213.457	249.878	204.851	216.646	234.961	255.871	292.4
			203.155	223.284	216.525	230.439	232.764	217.571	236.266	256.379	281.009	265.729
		40cm	N0	N1	N2	N3	N4	N0	N1	N2	N3	N4
			101.434	111.038	113.59	114.265	102.976	127.612	123.229	152.045	155.24	140.935
			107.986	104.896	109.156	105.969	104.548	119.361	141.911	131.496	149.634	157.373
			99.3544	101.791	103.469	108.039	112.697	135.232	136.33	141.63	133.746	160.03

## Sheet: urease
		urease	LRGP					RSGP
		20cm	N0	N1	N2	N3	N4	N0	N1	N2	N3	N4
			0.267152	0.353821	0.358585	0.374776	0.418585	0.351917	0.348108	0.338108	0.419063	0.419541
			0.321917	0.307624	0.349535	0.41049	0.361445	0.303343	0.328108	0.372394	0.356203	0.420967
			0.26477	0.291911	0.311917	0.333821	0.439541	0.320012	0.38049	0.414776	0.448114	0.340012
		40cm	N0	N1	N2	N3	N4	N0	N1	N2	N3	N4
			0.148102	0.153815	0.184293	0.189057	0.17477	0.189624	0.179057	0.183102	0.188579	0.187152
			0.165242	0.173815	0.190955	0.182866	0.202866	0.171433	0.190961	0.175006	0.211911	0.1824
			0.145719	0.161911	0.168096	0.160006	0.187152	0.178961	0.197624	0.192388	0.193815	0.204293

## Sheet: catalase
		catalase	LRGP					RSGP
		20cm	N0	N1	N2	N3	N4	N0	N1	N2	N3	N4
			32.674	32.946	32.946	32.946	31.946	33.813	34.8233	34.4613	34.81	31.212
			29.01	32.946	32.946	34.813	33.813	32.946	31.05	32.5116	33.664	35.53
			30.276	29.478	31.212	31.946	34.813	33.9864	32.9718	30.4057	32.946	32.946
		40cm	N0	N1	N2	N3	N4	N0	N1	N2	N3	N4
			29.478	31.212	32.946	33.813	32.946	29.2664	32.1976	30.65	33.11	33.946
			32.212	31.212	33.646	31.746	31.9864	32.5992	29.3416	33.86	34.276	32.478
			30.744	32.946	31.212	32.946	33.9164	30.43	32.084	31.66	31.478	31.532

## Sheet: sucrase
		sucrase	LRGP					RSGP
		20cm	N0	N1	N2	N3	N4	N0	N1	N2	N3	N4
			0.828115	0.75414	0.81373	0.952091	0.850451	0.858115	0.828525	0.910164	0.82291	0.788525
			0.727008	0.81373	0.858115	0.810041	0.976476	0.78414	0.84332	0.78414	0.85373	0.82373
			0.777705	0.87332	0.87291	0.937705	0.926066	0.84332	0.887705	0.814549	0.921681	0.924959
		40cm	N0	N1	N2	N3	N4	N0	N1	N2	N3	N4
			0.76373	0.754549	0.798935	0.84332	0.796886	0.788525	0.808115	0.798935	0.81332	0.727992
			0.690984	0.749754	0.82332	0.858115	0.878935	0.72414	0.754549	0.760164	0.754959	0.754549
			0.734959	0.818525	0.759754	0.75373	0.81373	0.677828	0.755369	0.808115	0.78414	0.810164
