# Supplementary material for: Effects of different ratios of nitrogen base fertilizer to topdressing on soil nitrogen form and enzyme activity in sugar beet under shallow drip irrigation
Source: PeerJ. 2024 Oct 14;12:e18219. doi: 10.7717/peerj.18219 (PMC11485128; doi:10.7717/peerj.18219)
Supplement: Supplemental Information 2 [file peerj-12-18219-s002.xlsx]

## Sheet: Sheet1
	2020	Yield							Sugar content						Sugar yield						AEN
		N0	N1	N2	N3	N4			N0	N1	N2	N3	N4		N0	N1	N2	N3	N4		N0	N1	N2	N3	N4
		69954.4	71430.8	70677.2	74216.5	70552.3	57478.1		16.464	16.2675	16.2434	16.1673	16.0726		11517.3	11620	11480.4	11998.8	11339.6		94.0958	103.939	98.9146	122.51	98.0821
		68026.5	70000.1	73045.9	71659.8	72129.6	55881.7		16.348	16.4151	16.263	16.2421	16.1994		11121	11490.6	11879.4	11639	11684.5		81.2432	94.401	114.706	105.465	108.598
		66157.4	68849.5	70437.5	74312.7	73878.5	54160.2		16.3876	16.3491	16.3879	16.3359	16.2363		10841.6	11256.3	11543.2	12139.7	11995.1		68.7825	86.73	97.3168	123.152	120.257
	2021	Yield							Sugar content						Sugar yield						AEN
		N0	N1	N2	N3	N4			N0	N1	N2	N3	N4		N0	N1	N2	N3	N4		N0	N1	N2	N3	N4
		63153.1	67303.4	70453.7	70853.9	67853.9	55101.8		16.1	16.2956	16.2719	16.4305	16.2744		10167.6	10967.5	11464.1	11641.6	11042.8		64.2092	91.8778	112.88	115.548	95.5477
		65052	65453.9	67142.4	68102.8	69752.7	53514.6		16.1271	16.3464	16.3463	16.2693	16.1058		10491	10699.4	10975.3	11079.8	11234.3		76.8687	79.5477	90.8047	97.2077	108.207
		66092.8	66952.7	67753.2	70953.5	66603.1	51948.8		16.33	16.1481	16.5212	16.2671	16.3036		10793	10811.6	11193.7	11542.1	10858.7		83.8077	89.5397	94.8764	116.212	87.2097
