# Supplementary material for: Effects of different ratios of nitrogen base fertilizer to topdressing on soil nitrogen form and enzyme activity in sugar beet under shallow drip irrigation
Source: PeerJ. 2024 Oct 14;12:e18219. doi: 10.7717/peerj.18219 (PMC11485128; doi:10.7717/peerj.18219)
Supplement: Supplemental Information 3 [file peerj-12-18219-s003.xlsx]

## Sheet: Sheet1
Treatments	Yield	Sugar content	Sugar yield	Nitrate nitrogen	Ammonium nitrogen	Protease activity	Urease activity	Sucrase activity	Catalase activity
N0	68046.1	16.3999	11160	11.1932	20.2033	207.355	0.325091	0.828525	33.5818
N1	70093.5	16.3439	11455.6	11.8963	18.5724	225.313	0.352235	0.853183	32.946
N2	71386.9	16.2981	11634.4	12.9611	19.4855	240.016	0.375093	0.836284	32.46
N3	73396.3	16.2484	11925.8	14.751	21.5556	266.816	0.407793	0.866107	33.813
N4	72186.8	16.1694	11673.1	16.9389	20.6764	278.852	0.393507	0.845738	33.23
